# Supplementary material for: Repair of O6-carboxymethylguanine adducts by O6-methylguanine-DNA methyltransferase in human colon epithelial cells
Source: Oxford University Press journal article supplement (doi:10.1093/carcin/bgab049), 2021-06-09
Supplement: bgab049_suppl_supplementary_materials.docx [file bgab049_suppl_supplementary_materials.docx]

**Repair of *O*6-carboxymethylguanine adducts by**

***O6*-methylguanine-DNA methyltransferase in human colon epithelial cells**

**- Supplementary Material -**

Tina Kostka1, 2, †, Michael T. Empl1, †, Nina Seiwert3, †, Susanne M. Geisen4, Pascal Hoffmann5, Janine Adam1, Bettina Seeger1, 6, Jerry W. Shay7, Markus Christmann8, Shana J. Sturla4, Jörg Fahrer3, Pablo Steinberg1, 9, *

1 Institute for Food Toxicology, University of Veterinary Medicine Hannover, Hannover, Germany

2 Current address: Institute of Food Science and Human Nutrition, Gottfried Wilhelm Leibniz University Hannover, Hannover, Germany

3 Division of Food Chemistry and Toxicology, Department of Chemistry, Technical University of Kaiserslautern, Kaiserslautern, Germany

4 Department of Health Sciences and Technology, ETH Zurich, Zurich, Switzerland

5 Institute for Physiology and Cell Biology, University of Veterinary Medicine Hannover, Hannover, Germany

6 Current address: Institute for Food Quality and Food Safety, University of Veterinary Medicine Hannover, Hannover, Germany

7 Department of Cell Biology, University of Texas Southwestern Medical Center, Dallas, TX 75390, USA

8 Department of Toxicology, University Medical Center Mainz, Mainz, Germany

9 Current address: Max Rubner-Institut, Federal Research Institute of Nutrition and Food, Karlsruhe, Germany

* Corresponding author: Pablo Steinberg (email: Pablo.Steinberg@mri.bund.de)
† These authors contributed equally to this work


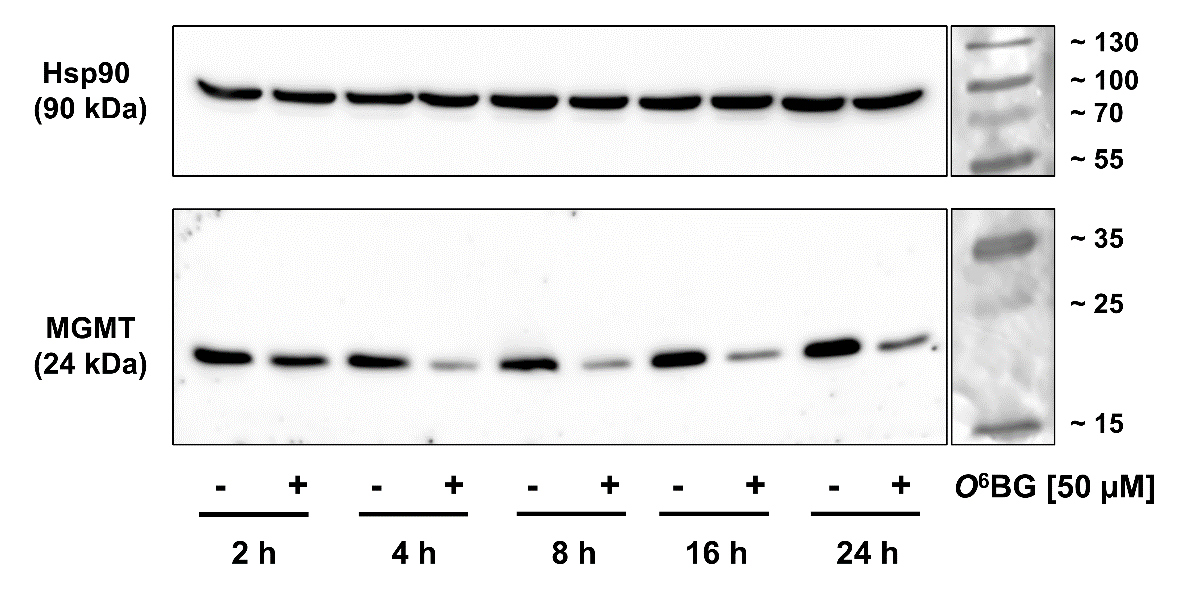


**Supplementary Fig. 1: Western blot images showing time-dependent depletion of MGMT protein expression levels upon treatment with 0.1 % DMSO (-) or *O*6BG (+) in HCEC 1CT cells.** The intensity signal of Hsp90 served as loading control, while molecular markers verified the protein sizes.


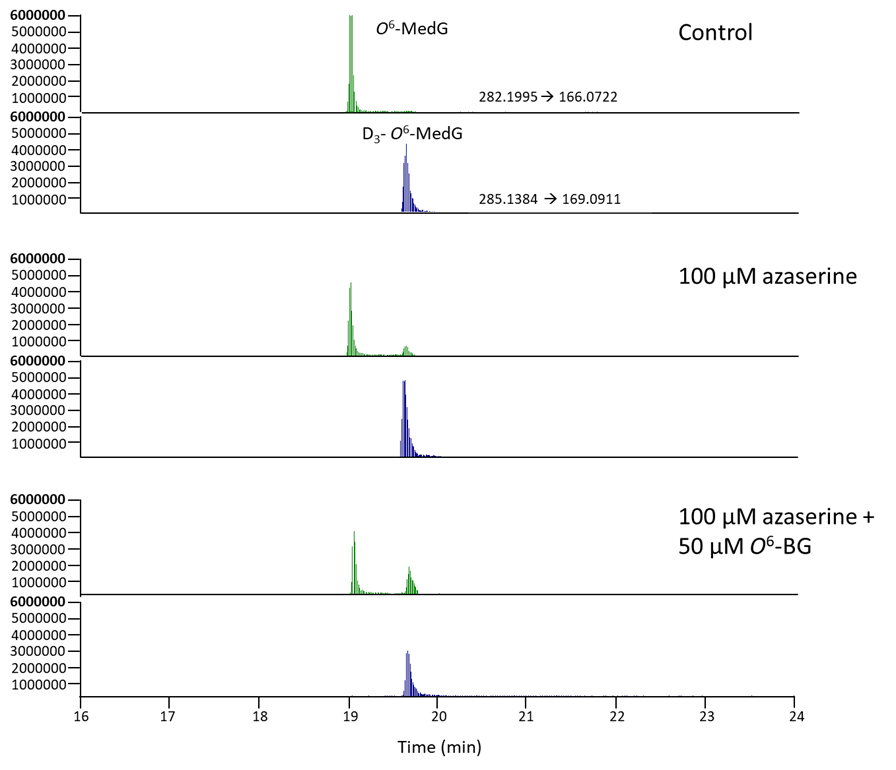


**100 µM AZA +
50 µM *O*6BG**

**100 µM AZA**

**Control**

**Abundance**

**Supplementary Fig. 2: Representative ion chromatograms of *O*6-MedG adducts extracted from HCEC 1CT cells after cellular treatment.** D3-*O*6-MedG was used as internal standard. The peak with m/z 282.1995→166.0722 is *N*2-MedG.


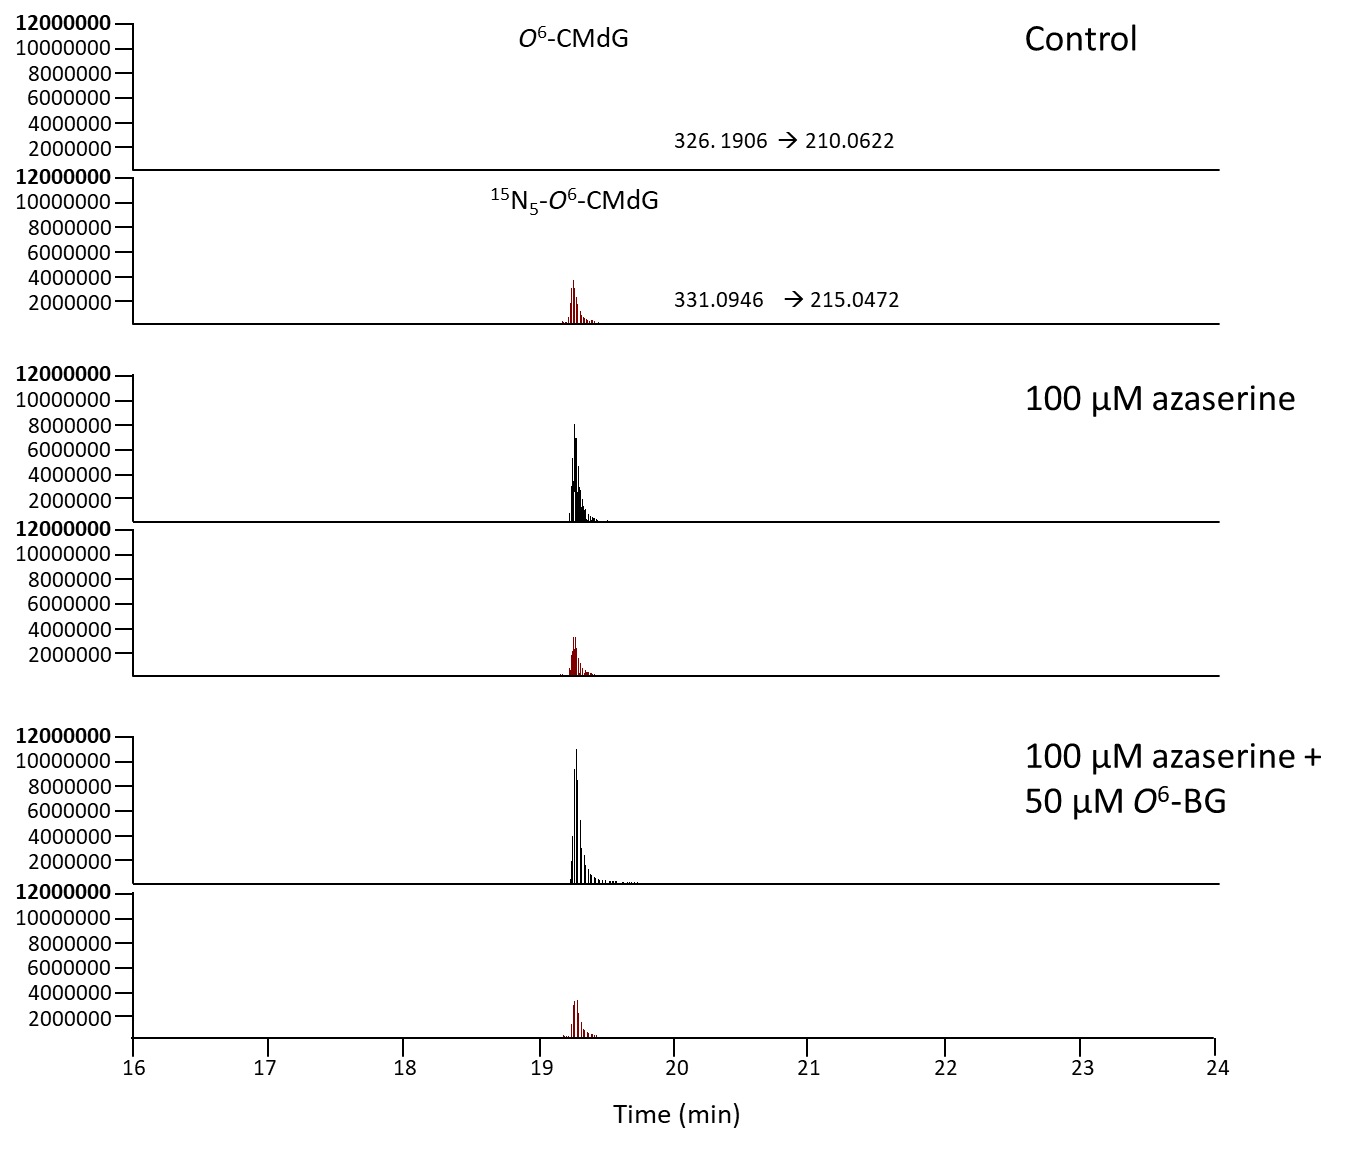


**100 µM AZA +
50 µM *O*6BG**

**100 µM AZA**

**Control**

**Abundance**

**Supplementary Fig. 3: Representative ion chromatograms of *O*6-CMdG adducts extracted from HCEC 1CT cells after cell treatment.** 15N5-*O*6-CMdG was used as internal standard.

**Supplementary Table I: Reduced MGMT activity in HCEC 1CT cells induced by various concentrations of *O*6BG.** The activity of MGMT-deficient HeLa MR cells served as blank and was used for the calculation of corrected radioactivity. Significance levels are given in **Figure 2C** of the main manuscript.

| **Sample** | **Radioactivity**  **[cpm] in triplicate** | **Corrected radioactivity [cpm]** | **MGMT activity**  **[fmol/mg protein]** | **Mean (± SEM)** |
| --- | --- | --- | --- | --- |
| **DMSO** | 1627.19 | 1427.19 | 211.30 | 203.93 (± 7.43) |
| 1502.19 | 1277.02 | 189.06 |
| 1652.93 | 1428.10 | 211.43 |
| **0.1 µM O6BG** | 901.12 | 701.12 | 103.80 | 90.57 (± 7.44) |
| 752.31 | 527.15 | 78.04 |
| 831.78 | 606.95 | 89.86 |
| **1 µM *O*6BG** | 342.38 | 142.38 | 21.08 | 15.94 (± 2.60) |
| 310.63 | 85.47 | 12.65 |
| 319.91 | 95.08 | 14.08 |
| **10 µM *O*6BG** | 275.97 | 75.97 | 11.25 | 5.03 (± 3.12) |
| 240.62 | 15.46 | 2.29 |
| 235.23 | 10.40 | 1.54 |
| **HeLa MR blank** | 200.00 |  |  |  |
| 225.17 |  |  |  |
| 224.83 |  |  |  |

**Supplementary Table II: Targeted *m/z* of compounds and fractions after neutral loss of deoxyribose (dR) detected using tandem mass spectrometry in different modes.** D3-*O*6-MedG and 15N5-*O*6-CMdG were used as internal standards.

| **Compound** | **MSn** | **Molecular ions** | ***m/z*** | **Chemical structure of**  **compounds and fractions** |
| --- | --- | --- | --- | --- |
| ***O*6-MedG** | MS1 | [M+H]+ | 282 | 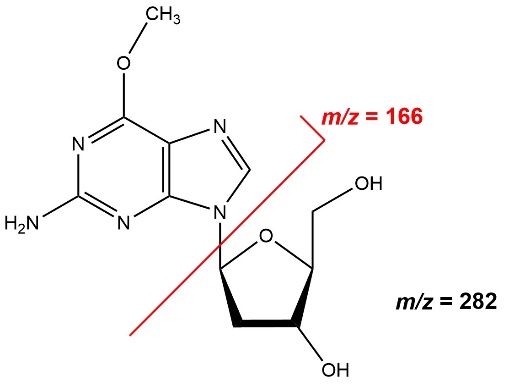 |
| MS2 | [M+H-dR]+ | 166 |
| **D3-*O*6-MedG** | MS1 | [M+H]+ | 285 | 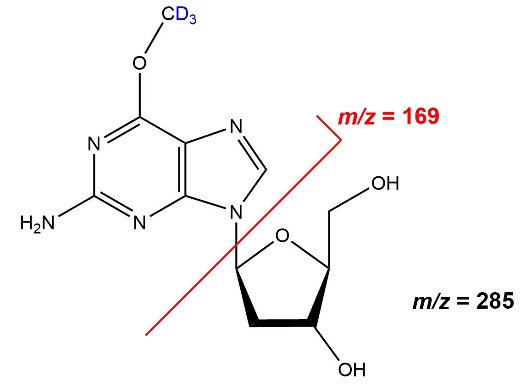 |
| MS2 | [M+H-dR]+ | 169 |
| ***O*6-CMdG** | MS1 | [M+H]+ | 326 | 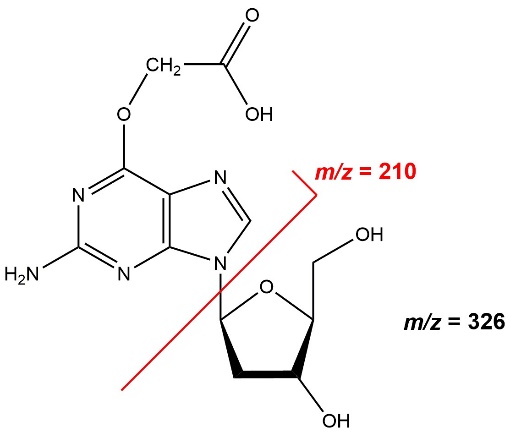 |
| MS2 | [M+H-dR]+ | 210 |
| **15N5-*O*6-CMdG** | MS1 | [M+H]+ | 331 | 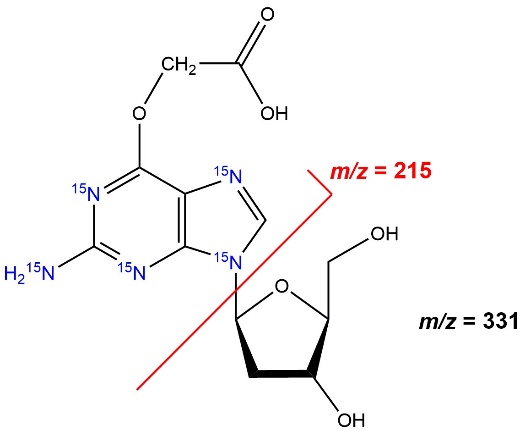 |
| MS2 | [M+H-dR]+ | 215 |
